# Supplementary material for: Clinicogenomic factors of biotherapy immunogenicity in autoimmune disease: A prospective multicohort study of the ABIRISK consortium
Source: PubMed Central journal article supplement (PMC7598520; doi:10.1371/journal.pmed.1003348), 2020-10-30
Supplement: pmed.1003348.s003.pdf [file pmed.1003348.s003.pdf]

**S1 Table. Clinical characteristics at baseline in BP-treated patients stratified by disease cohort**

|                                                        | MS          | RA          | IBD          |
|--------------------------------------------------------|-------------|-------------|--------------|
| Characteristics                                        | (n =147)    | (n =229)    | (n=184)      |
| Disease duration, median (IQR), years                  | 0.85 (2.28) | 3.17 (7.58) | 3.69 (10.37) |
| Family history of the same disease, n (%)              | 7 (4.76)    | 41 (17.9)   | 33 (17.9)    |
| Vaccines during the last year, n (%)                   | 7 (4.76)    | 84 (36.68)  | 28 (15.21)   |
| Disease type, n (%)                                    |             |             |              |
| CIS                                                    | 45 (30.6)   | -           | -            |
| RRMS                                                   | 101 (68.7)  | -           | -            |
| Secondary progressive                                  | 1 (0.7)     | -           | -            |
| EDSS, median (IQR)                                     | 1.75 (1.00) | -           | -            |
| Number of relapses in the last two years, median (IQR) | 1.00 (1.00) | -           | -            |
| Disease type, n (%)                                    |             |             |              |
| Crohn's disease                                        | -           | -           | 148 (80.4)   |
| Ulcerative colitis                                     | -           | -           | 36 (19.6)    |
| Mayo score, median (IQR)                               | -           | -           | 6.00 (5.00)  |
| Harvey-Bradshaw Index, median (IQR)                    | -           | -           | 5.00 (5.00)  |
| Disease location, n (%)                                |             |             |              |
| Colonic                                                | -           | -           | 27 (18.4)    |
| Ileal                                                  | -           | -           | 66 (44.9)    |
| Ileocolonic                                            | -           | -           | 53 (36.1)    |
| Isolated Upper Disease                                 | -           | -           | 1 (0.6)      |
| Disease behavior, n (%)                                |             |             |              |
| Non-stricturing, non-penetrating                       | -           | -           | 68 (46.3)    |
| Penetrating                                            | -           | -           | 28 (19.0)    |
| Stricturing                                            | -           | -           | 51 (34.7)    |
| RF positivity, n (%)                                   | -           | 149 (68.0)  | -            |
| ACPA positivity, n (%)                                 | -           | 152 (70.0)  | -            |
| DAS28, median (IQR)                                    | -           | 4.55 (1.68) | -            |

BP, Biopharmaceutical product; MS, multiple sclerosis; RA, rheumatoid arthritis; IBD, inflammatory bowel disease; IQR, interquartile range; CIS, clinically isolated syndrome; RRMS, relapsing remitting multiple sclerosis; EDSS, expanded disability status scale; RF, rheumatoid factor; ACPA, anti-citrullinated peptide antibodies; DAS28, disease activity score 28.
