# Supplementary material for: Clinicogenomic factors of biotherapy immunogenicity in autoimmune disease: A prospective multicohort study of the ABIRISK consortium
Source: PubMed Central journal article supplement (PMC7598520; doi:10.1371/journal.pmed.1003348), 2020-10-30

## S2 Fig

**GWAS results (Manhattan plot).** Genomic coordinates on 23 chromosomes are displayed on the x-axis, the negative logarithm of the association P-value with ADA occurrence for each SNP is displayed on the y-axis. The blue horizontal dotted line represents the threshold of significance with a 20% FDR and the red dots are the SNPs above the threshold. GWAS, genome-wide association study; SNP, single nucleotide polymorphism.

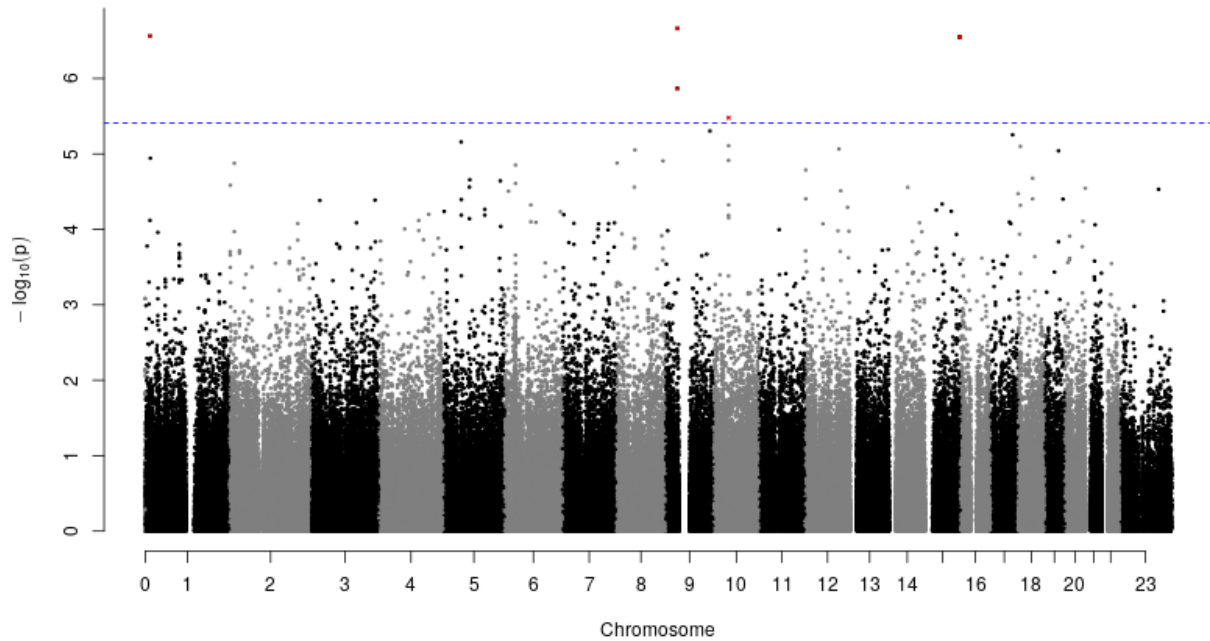

Supplement: pmed.1003348.s007.pdf [file pmed.1003348.s007.pdf]
